# Supplementary material
Source: MDPI journal article supplement (https://www.mdpi.com/2073-445X/11/7/969)
Supplement: s1 [file s1 › land-1779990-supplementary.pdf]

**Table S1. Explanation of the top 25 POI categories and related socioeconomic activities in this study**

| POI category                               | Explanation                                                                                                                                 | Socioeconomic activities |
|--------------------------------------------|---------------------------------------------------------------------------------------------------------------------------------------------|--------------------------|
| House number                               | A number or number–letter combination that labels a building or apartment.                                                                  | Housing model            |
| Residential quarter                        | A contemporary urban multi-story residential building.                                                                                      | Housing model            |
| Company                                    | A legal entity, made up of an association of people, for carrying out a commercial or industrial enterprise.                                | Non-agriculturalization  |
| Clothing and accessory shop                | A retail shop where clothing, footwear, hats, and other accessories are sold.                                                               | Non-agriculturalization  |
| Other shop                                 | Unclassified shop.                                                                                                                          | Non-agriculturalization  |
| Home decoration and building material shop | A shop where windows, doors, cabinets, tiles, concrete, and other home decorating and building materials are sold.                          | Non-agriculturalization  |
| Exclusive shop                             | A shop where the products from only one manufacturer are sold.                                                                              | Non-agriculturalization  |
| Convenience shop                           | A small retail shop where a range of everyday items are sold.                                                                               | Non-agriculturalization  |
| Hair and beauty service shop               | A shop where hair styling services, other beauty services (e.g., manicure/pedicure, tanning) and spa services (e.g., massage) are provided. | Non-agriculturalization  |
| Shop for everyday services                 | A shop where an everyday service or services are provided, such as repairs, printing, and car rentals.                                      | Non-agriculturalization  |
| Supermarket                                | A self-service shop where a wide variety of food, beverages, and household products are offered.                                            | Non-agriculturalization  |
| Home appliance shop                        | A shop where various household electrical/mechanical machines are sold, such as air conditioners, computers, fans, and washing machines.    | Non-agriculturalization  |

|                                 |                                                                                                                |                         |
|---------------------------------|----------------------------------------------------------------------------------------------------------------|-------------------------|
| Lottery shop                    | A licensed shop where lottery tickets are sold.                                                                | Non-agriculturalization |
| Hardware shop                   | A shop where various types of hardware are sold, such as electrical wire, chains, keys, locks, and generators. | Non-agriculturalization |
| Training school                 | An organization that provides training courses, for example in dancing, languages, and computer skills.        | Non-agriculturalization |
| Factory                         | A building or set of buildings with facilities for manufacturing.                                              | Non-agriculturalization |
| Chinese restaurant              | A restaurant serving Chinese cuisine.                                                                          | Non-agriculturalization |
| Other restaurant                | An unclassified restaurant.                                                                                    | Non-agriculturalization |
| Fast-food restaurant            | A restaurant where cheap food is served with a short wait-time, regardless of the type of food offered.        | Non-agriculturalization |
| Street name                     | A name that labels a street or road.                                                                           | Transportation          |
| Bus station                     | A designated place where buses stop for passengers to board or disembark from a bus.                           | Transportation          |
| Bridge name                     | The name of a bridge that was built for transportation.                                                        | Transportation          |
| Intersection name               | The name of a junction where two or more roads or streets meet or cross.                                       | Transportation          |
| Township hospital               | A public health center that is established at the township level.                                              | Health service          |
| Clinic                          | A private health facility that covers the primary care needs of populations in local communities.              | Health service          |
| Pharmacy                        | A shop where medications and other health and well-being products are offered.                                 | Health service          |
| Place name at the village level | A name that indicates a particular location or region within a village.                                        | Other                   |
| Mountain                        | A name that labels a mountainous or hilly landform.                                                            | Other                   |

|                                            |                                                                  |       |
|--------------------------------------------|------------------------------------------------------------------|-------|
| River                                      | A name that labels a river landform.                             | Other |
| Buddhist and Taoist temple                 | A place of worship for Buddhists or Taoists.                     | Other |
| Public toilet                              | A public room or small building with toilets and sinks.          | Other |
| Kindergarten                               | A preschool educational facility.                                | Other |
| Government agency below the township level | A governmental agency below the township level.                  | Other |
| Government agency at the township level    | A governmental agency at the township level.                     | Other |
| Other government agency                    | An unclassified government agency.                               | Other |
| Petrol station                             | A facility where fuel is sold.                                   | Other |
| Primary school                             | A state-run school that provides the compulsory basic education. | Other |
| Other place name                           | An unclassified place name.                                      | Other |
